# Supplementary material for: Is This Science? Students’ Experiences of Failure Make a Research-Based Course Feel Authentic
Source: Atypon-hosted journal article supplement (doi:10.1187/cbe.20-07-0149), 2021-02-18
Supplement: combinedsupmats.pdf [file combinedsupmats.pdf]

# **Supplemental Material**

*CBE—Life Sciences Education*

Goodwin *et al.*

# Is this Science? Exploring Student Beliefs about what Makes a Research-Based Course Feel Authentic

## Supplemental Materials

Goodwin *et. al* 2020

### Table of Contents

|                                                                                       |          |
|---------------------------------------------------------------------------------------|----------|
| <b>APPENDIX 1. LABORATORY COURSE ASSESSMENT SURVEY (LCAS).....</b>                    | <b>3</b> |
| <b>APPENDIX 2. LCAS CORRELATED THREE-FACTOR MODEL.....</b>                            | <b>4</b> |
| <b>APPENDIX 3. PARTICIPANT DEMOGRAPHICS AND CHI-SQUARE TESTS OF INDEPENDENCE.....</b> | <b>5</b> |
| <b>APPENDIX 4. LCAS ITEM SUMMARY STATISTICS.....</b>                                  | <b>6</b> |
| <b>APPENDIX 5. RELIABILITY ESTIMATES FOR LCAS SCALES.....</b>                         | <b>8</b> |
| <b>REFERENCES .....</b>                                                               | <b>9</b> |

## Appendix 1. Laboratory Course Assessment Survey (LCAS)

*Adapted from Corwin et al., 2015:*

| Construct                  | Prompt                 | Item # | Item Text                                                                                                                                              | Item Response Options                                                                                                                                    |
|----------------------------|------------------------|--------|--------------------------------------------------------------------------------------------------------------------------------------------------------|----------------------------------------------------------------------------------------------------------------------------------------------------------|
| <i>Collaboration</i>       | I was encouraged to... | C1     | discuss elements of my investigation with classmates or instructors                                                                                    | 1#: Never<br>2: Only once<br>3: A couple of times, but not every lab period<br>4: About once per lab period<br>5: Multiple times during most lab periods |
|                            |                        | C2     | reflect on what I was learning                                                                                                                         |                                                                                                                                                          |
|                            |                        | C3     | contribute my ideas and suggestions during class discussions                                                                                           |                                                                                                                                                          |
|                            |                        | C4     | help other students collect or analyze data                                                                                                            |                                                                                                                                                          |
|                            |                        | C5     | provide constructive criticism to classmates and challenge each other's interpretations                                                                |                                                                                                                                                          |
|                            |                        | C6     | share the problems I encountered during my investigation and seek input on how to address them                                                         |                                                                                                                                                          |
| <i>Discovery/Relevance</i> | I was expected to...   | D1     | generate novel results that are unknown to the instructor and that could be of interest to the broader scientific community or others outside of class | 1: Strongly disagree<br>2: Disagree<br>3: Somewhat disagree<br>4: Somewhat agree<br>5: Agree<br>6: Strongly agree                                        |
|                            |                        | D2     | conduct an investigation to find something previously unknown to myself, other students, and the instructor                                            |                                                                                                                                                          |
|                            |                        | D3*    | formulate my own research questions or hypothesis to guide an investigation                                                                            |                                                                                                                                                          |
|                            |                        | D4     | develop new arguments based on data                                                                                                                    |                                                                                                                                                          |
|                            |                        | D5     | explain how my work has resulted in new scientific knowledge                                                                                           |                                                                                                                                                          |
| <i>Iteration</i>           | I had time to...       | I1*    | revise or repeat work to account for errors or fix problems                                                                                            |                                                                                                                                                          |
|                            |                        | I2     | change the methods of the investigation if it was not unfolding as predicted                                                                           |                                                                                                                                                          |
|                            |                        | I3     | share and compare data with other students                                                                                                             |                                                                                                                                                          |
|                            |                        | I4     | collect and analyze additional data to address new questions or further test hypotheses that arose during the investigation                            |                                                                                                                                                          |
|                            |                        | I5     | revise or repeat analyses based on feedback                                                                                                            |                                                                                                                                                          |
|                            |                        | I6     | revise drafts of papers or presentations about my investigation based on feedback                                                                      |                                                                                                                                                          |

*\*Indicates items D3 and I1, which were removed from analyses due to content and structural validity issues (respectively). I1 is included with the Discovery/Relevance items in this table due to the common question stem ("I was expected to..."). #Note that original item response options for the Collaboration scale are as follows: 1= Weekly; 2= Monthly; 3= One or two times, 4= Never. We have reversed the item coding for this scale to follow the same direction as the Iteration and Discovery/Relevance scales.*

## Appendix 2. LCAS Correlated Three-Factor Model

Adapted from Corwin et al., 2015:

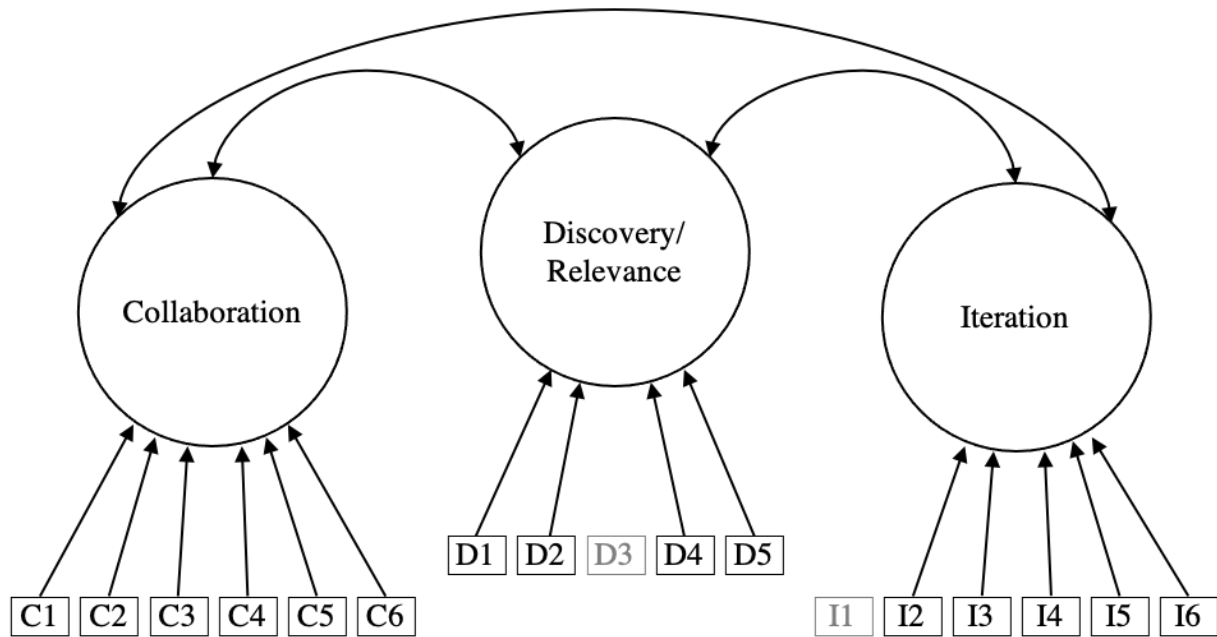

We used the Laboratory Course Assessment Survey to test a correlated three-factor model of *Collaboration*, *Relevant Discovery*, and *Iteration*. Boxes with item numbers represent the survey items that serve as indicators for each latent factor. Two items (D3 and I1, in grey) were not included in our final model.

### Appendix 3. Participant demographics and chi-square tests of independence

| Demographics <sup>a</sup>         | Inquiry Students<br>n = 302 | CURE Students<br>n = 74 | $\chi^2$ Test Results      |
|-----------------------------------|-----------------------------|-------------------------|----------------------------|
|                                   | n (%)                       | n (%)                   |                            |
| <b>Legal Sex<sup>b</sup></b>      |                             |                         |                            |
| Female                            | 179 (59.3)                  | 47 (63.5)               | $\chi^2 = 0.33, p = 0.565$ |
| Male                              | 120 (39.7)                  | 27 (36.5)               |                            |
| <b>Race/Ethnicity<sup>c</sup></b> |                             |                         |                            |
| Underrepresented Minority (URM)   | 62 (20.5)                   | 12 (16.2)               | $\chi^2 = 0.69, p = 0.403$ |
| Non-URM                           | 240 (79.5)                  | 62 (83.8)               |                            |
| <b>Generation Status</b>          |                             |                         |                            |
| First Generation                  | 103 (34.1)                  | 22 (29.7)               | $\chi^2 = 0.21, p = 0.648$ |
| Continuing Generation             | 147 (48.7)                  | 36 (48.6)               |                            |
| <b>Transfer Status</b>            |                             |                         |                            |
| Transfer Undergraduate            | 110 (36.4)                  | 30 (40.5)               | $\chi^2 = 1.49, p = 0.222$ |
| Non- Transfer Undergraduate       | 156 (51.7)                  | 30 (40.5)               |                            |
| <b>Post-Baccalaureate</b>         |                             |                         |                            |
| Post-Bac                          | 35 (11.6)                   | 14 (18.9)               | $\chi^2 = 2.81, p = 0.093$ |
| Undergraduate                     | 267 (88.4)                  | 60 (81.1)               |                            |
| <b>Major</b>                      |                             |                         |                            |
| Biology                           | 162 (53.6)                  | 43 (58.1)               | $\chi^2 < 0.42, p = 0.516$ |
| Other STEM Major                  | 130 (43.0)                  | 29 (39.2)               |                            |

<sup>a</sup> Unless otherwise stated, data was obtained from the institutional database. Percentages in each demographic group may not add up to 100% due to missing student information for certain demographic categories. <sup>b</sup> We were unfortunately only able to obtain legal sex information from our institution, which likely mischaracterizes the gender identity of some of our participants. <sup>c</sup> Students who identified as Hispanic/Latino, Native American/Alaskan/Hawaiian, Black or African American, and Pacific Islander were classified as underrepresented minorities (URM).

#### Appendix 4. LCAS Item Summary Statistics

Summary statistics for items in each of the three LCAS constructs are included in the tables below. Suggested interpretations of skewness and kurtosis when evaluating normality of data vary widely. Overall, our items show little skew (all absolute skewness values are less than 2.0), and some kurtosis (ranging between 1.6 and 5.5). Acceptable absolute kurtosis values for normal data range from below 2.0 ("conservative", Hancock et al., 2018) to below 7.0 ("liberal", Hancock et al., 2018) or even below 10.0 ("conservative"; Kline, 2015). To account for this moderate non-normality of our data, we used a robust estimator in our confirmatory factor analyses.

#### Collaboration Item Summary Statistics

| Items | Group   | Mean | SD   | Median | Min | Max | Skewness | Kurtosis |
|-------|---------|------|------|--------|-----|-----|----------|----------|
| C1    | CURE    | 4.65 | 0.61 | 5      | 3   | 5   | -1.54    | 4.22     |
|       | Inquiry | 4.28 | 0.94 | 5      | 1   | 5   | -1.25    | 4.11     |
|       | Total   | 4.34 | 0.90 | 5      | 1   | 5   | -1.36    | 4.47     |
| C2    | CURE    | 4.60 | 0.58 | 5      | 3   | 5   | -1.14    | 3.31     |
|       | Inquiry | 4.15 | 0.95 | 4      | 1   | 5   | -1.12    | 4.16     |
|       | Total   | 4.23 | 0.91 | 4      | 1   | 5   | -1.23    | 4.54     |
| C3    | CURE    | 4.35 | 0.90 | 5      | 2   | 5   | -1.14    | 3.22     |
|       | Inquiry | 3.95 | 1.13 | 4      | 1   | 5   | -1.05    | 3.51     |
|       | Total   | 4.02 | 1.10 | 4      | 1   | 5   | -1.10    | 3.64     |
| C4    | CURE    | 4.33 | 0.99 | 5      | 1   | 5   | -1.57    | 4.97     |
|       | Inquiry | 4.33 | 0.91 | 5      | 1   | 5   | -1.40    | 4.93     |
|       | Total   | 4.33 | 0.92 | 5      | 1   | 5   | -1.44    | 4.96     |
| C5    | CURE    | 4.02 | 1.06 | 4      | 1   | 5   | -1.02    | 3.81     |
|       | Inquiry | 3.56 | 1.25 | 4      | 1   | 5   | -0.56    | 2.44     |
|       | Total   | 3.65 | 1.23 | 4      | 1   | 5   | -0.64    | 2.59     |
| C6    | CURE    | 4.42 | 0.79 | 5      | 2   | 5   | -1.17    | 3.54     |
|       | Inquiry | 4.03 | 1.09 | 4      | 1   | 5   | -1.05    | 3.58     |
|       | Total   | 4.10 | 1.05 | 4      | 1   | 5   | -1.13    | 3.80     |

### Discovery Item Summary Statistics

| Items | Group   | Mean | SD   | Median | Min | Max | Skewness | Kurtosis |
|-------|---------|------|------|--------|-----|-----|----------|----------|
| D1    | CURE    | 5.14 | 0.80 | 5      | 4   | 6   | -0.25    | 1.62     |
|       | Inquiry | 4.23 | 1.31 | 4      | 1   | 6   | -0.47    | 2.62     |
|       | Total   | 4.39 | 1.28 | 4      | 1   | 6   | -0.60    | 2.81     |
| D2    | CURE    | 5.40 | 0.69 | 6      | 4   | 6   | -0.70    | 2.33     |
|       | Inquiry | 4.67 | 1.15 | 5      | 1   | 6   | -0.93    | 3.79     |
|       | Total   | 4.80 | 1.12 | 5      | 1   | 6   | -1.03    | 4.08     |
| D4    | CURE    | 5.19 | 0.76 | 5      | 4   | 6   | -0.32    | 1.81     |
|       | Inquiry | 4.83 | 0.98 | 5      | 1   | 6   | -0.91    | 4.27     |
|       | Total   | 4.89 | 0.96 | 5      | 1   | 6   | -0.91    | 4.31     |
| D5    | CURE    | 5.28 | 0.67 | 5      | 4   | 6   | -0.37    | 2.24     |
|       | Inquiry | 4.63 | 1.15 | 5      | 1   | 6   | -0.89    | 3.86     |
|       | Total   | 4.74 | 1.10 | 5      | 1   | 6   | -1.00    | 4.21     |

### Iteration Item Summary Statistics

| Items | Group   | Mean | SD   | Median | Min | Max | Skewness | Kurtosis |
|-------|---------|------|------|--------|-----|-----|----------|----------|
| I1    | CURE    | 5.40 | 0.73 | 6      | 3   | 6   | -1.13    | 4.13     |
|       | Inquiry | 4.50 | 1.28 | 5      | 1   | 6   | -0.87    | 3.37     |
|       | Total   | 4.66 | 1.25 | 5      | 1   | 6   | -1.00    | 3.69     |
| I2    | CURE    | 5.23 | 0.84 | 5      | 3   | 6   | -0.70    | 2.46     |
|       | Inquiry | 4.31 | 1.34 | 4      | 1   | 6   | -0.71    | 2.95     |
|       | Total   | 4.48 | 1.31 | 5      | 1   | 6   | -0.82    | 3.19     |
| I3    | CURE    | 5.37 | 0.69 | 5      | 4   | 6   | -0.63    | 2.28     |
|       | Inquiry | 4.99 | 1.01 | 5      | 1   | 6   | -1.32    | 5.45     |
|       | Total   | 5.06 | 0.97 | 5      | 1   | 6   | -1.36    | 5.71     |
| I4    | CURE    | 5.28 | 0.80 | 5      | 3   | 6   | -0.82    | 2.94     |
|       | Inquiry | 4.54 | 1.30 | 5      | 1   | 6   | -0.93    | 3.27     |
|       | Total   | 4.68 | 1.26 | 5      | 1   | 6   | -1.04    | 3.61     |
| I5    | CURE    | 5.26 | 0.69 | 5      | 4   | 6   | -0.38    | 2.13     |
|       | Inquiry | 4.24 | 1.36 | 4      | 1   | 6   | -0.60    | 2.55     |
|       | Total   | 4.42 | 1.33 | 5      | 1   | 6   | -0.77    | 2.87     |
| I6    | CURE    | 5.44 | 0.67 | 6      | 4   | 6   | -0.77    | 2.50     |
|       | Inquiry | 4.04 | 1.47 | 4      | 1   | 6   | -0.37    | 2.15     |
|       | Total   | 4.29 | 1.46 | 5      | 1   | 6   | -0.58    | 2.35     |

## **Appendix 5. Reliability estimates for LCAS scales**

McDonald's Omega was used to estimate reliability for all three subscales of the Laboratory Course Assessment Survey (Komperda et al., 2018). In general, reliability coefficients above 0.8 are "very good", indicating that all three subscales have acceptable internal consistency for these analyses (Kline, 2015). McDonald's Omega total for *Collaboration*, *Iteration*, and *Discovery/Relevance* was 0.86, 0.89, and 0.90 respectively.



## References

- Corwin, L. A., Runyon, C., Robinson, A., & Dolan, E. L. (2015). The laboratory course assessment survey: A tool to measure three dimensions of research-course design. *CBE—Life Sciences Education*, 14(4), ar37.
- Hancock, G. R., Stapleton, L. M., Mueller, R. O., Stapleton, L. M., & Mueller, R. O. (2018). *The Reviewer's Guide to Quantitative Methods in the Social Sciences*. Routledge.  
<https://doi.org/10.4324/9781315755649>
- Kline, R. B. (2015). *Principles and Practice of Structural Equation Modeling, Fourth Edition*. Guilford Publications.
- Komperda, R., Pentecost, T. C., & Barbera, J. (2018). Moving beyond Alpha: A Primer on Alternative Sources of Single-Administration Reliability Evidence for Quantitative Chemistry Education Research. *Journal of Chemical Education*, 95(9), 1477–1491.  
<https://doi.org/10.1021/acs.jchemed.8b00220>
